# Supplementary material
Source: Springer Nature journal article supplement (https://www.springermedizin.de/resource/supplementary/12939_2009_171_MOESM6_ESM.pdf/9551642)
Supplement: MOESM6 [file 9551642]

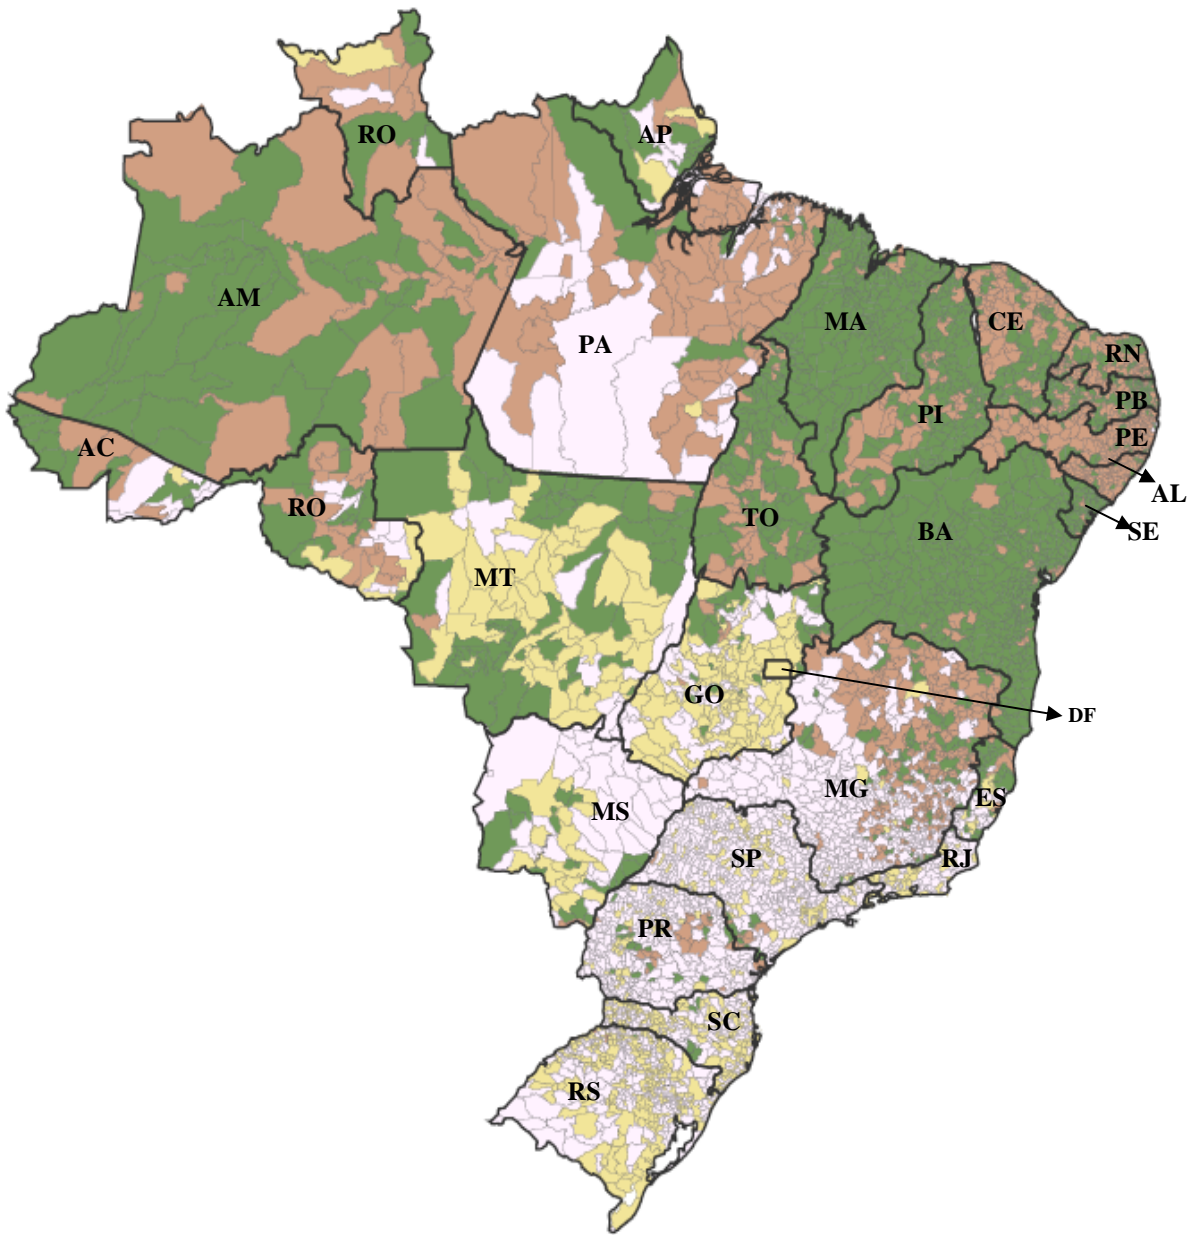

% Decrease 1991-2000 & level U5MR per 1000 lb 2

- Low decrease & High U5MR
- Low decrease & Low U5MR
- High decrease & High U5MR
- Low decrease & Low U5MR
